# Supplementary material
Source: Springer Nature journal article supplement (https://www.springermedizin.de/resource/supplementary/12876_2011_654_MOESM3_ESM.pdf/9437180)

### A. Stool frequency $\geq 1$ /day

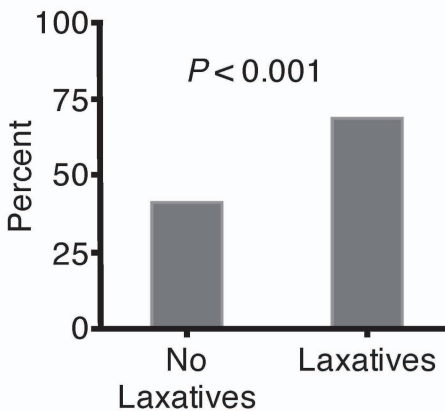

### B. Loose stool

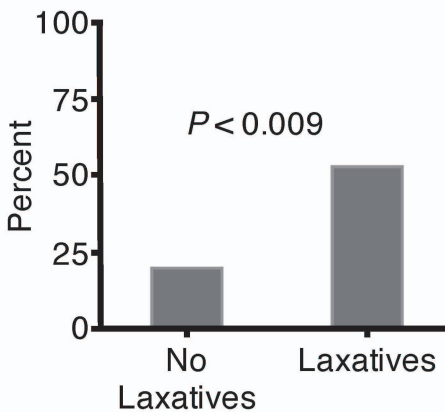

### C. Feeling of incomplete evacuation

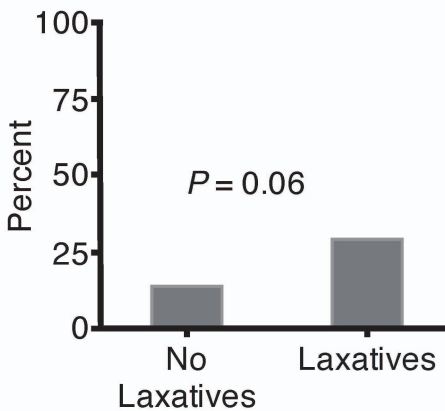

Supplement: MOESM3 [file 9437180]
